# Supplementary material for: Ultra-High Dose Rate FLASH Irradiation Induced Radio-Resistance of Normal Fibroblast Cells Can Be Enhanced by Hypoxia and Mitochondrial Dysfunction Resulting From Loss of Cytochrome C
Source: PubMed Central journal article supplement (PMC8121317; doi:10.3389/fcell.2021.672929), 2021-04-30
Supplement: Data_Sheet_1.pdf [file Data_Sheet_1.pdf]

## Supplementary Material

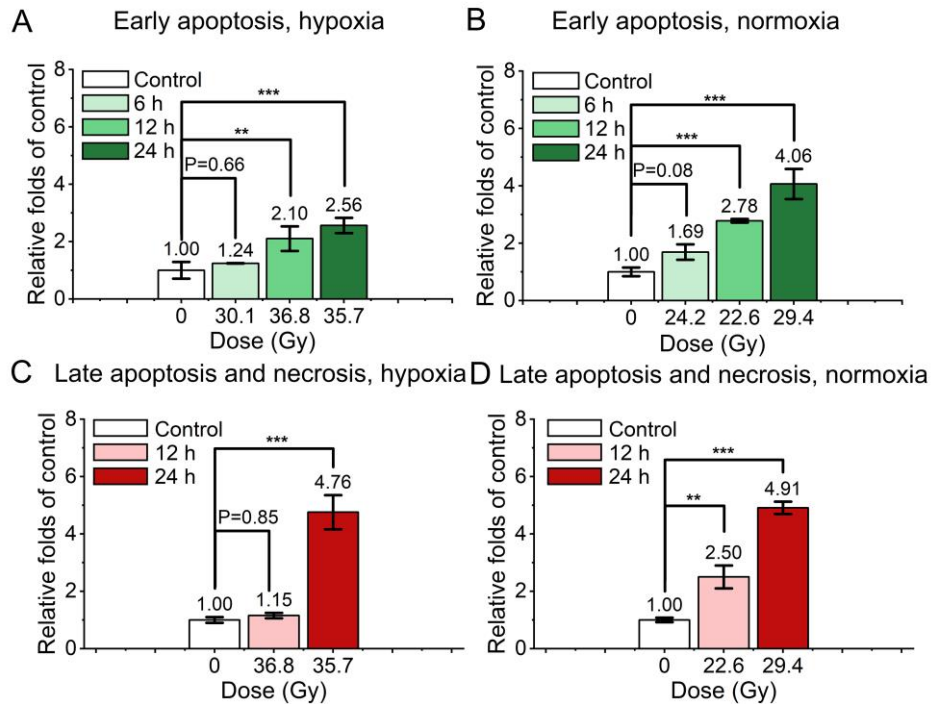

**Supplementary Figure 1.** Early apoptosis, late apoptosis and necrosis of normal fibroblast cells after FLASH irradiation. **(A-B)** The relative increasement of early apoptosis for cells at 6, 12 and 24 h after radiation in hypoxic (A) and normoxic condition (B). **(C-D)** The relative increasement of late apoptosis and necrosis for cells at 12 and 24 hours after radiation in hypoxic (C) and normoxic condition(D).

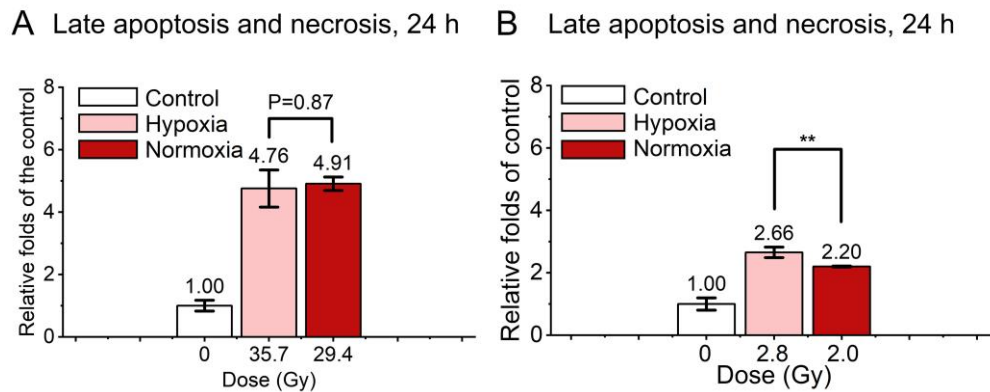

**Supplementary Figure 2.** Late apoptosis and necrosis of normal fibroblast cells after FLASH irradiation. (A-B) The relative increase of late apoptosis and necrosis in irradiated cells between hypoxia and normoxia at 24 h after high (A) or low (B) doses of irradiation.

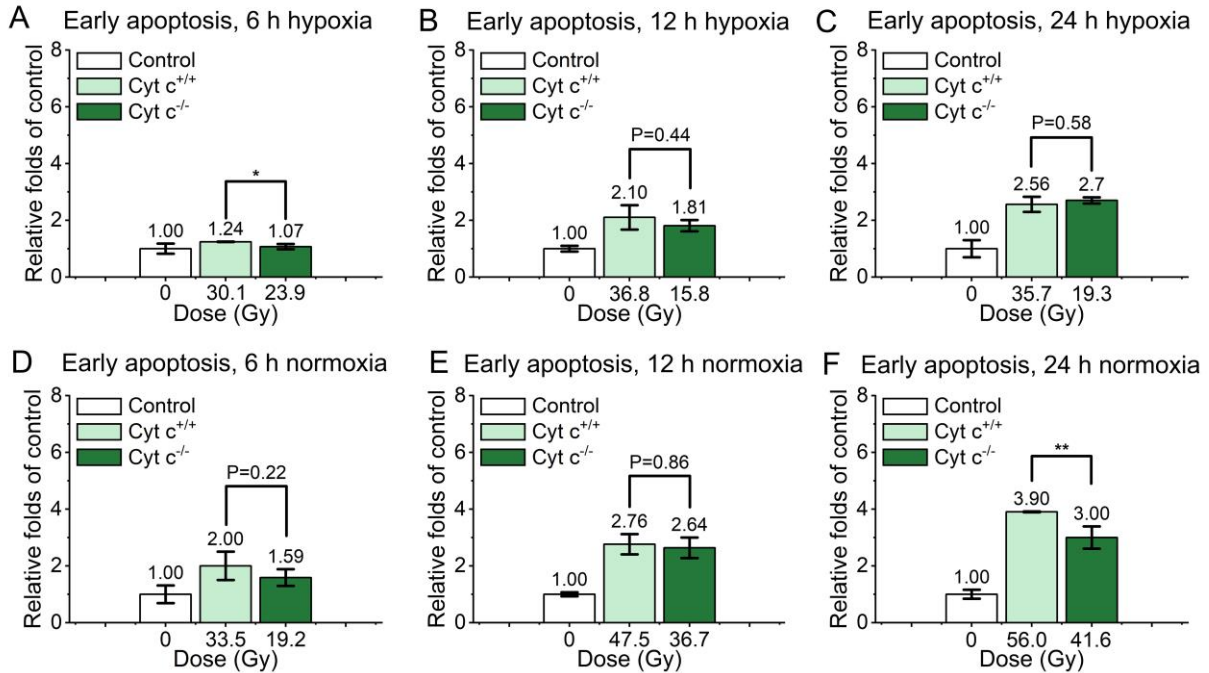

**Supplementary Figure 3.** Comparison of early apoptosis between irradiated cyt c<sup>+/+</sup> and cyt c<sup>-/-</sup> cells after FLASH irradiation. (A-F) The relative increase of early apoptosis for irradiated cyt c<sup>+/+</sup> and cyt c<sup>-/-</sup> cells at 6 h in hypoxia (A), 6 h in normoxia (D), 12 h in hypoxia (B), 12 h in normoxia (E), 24 h in hypoxia (C) and 24 h in normoxia (F).

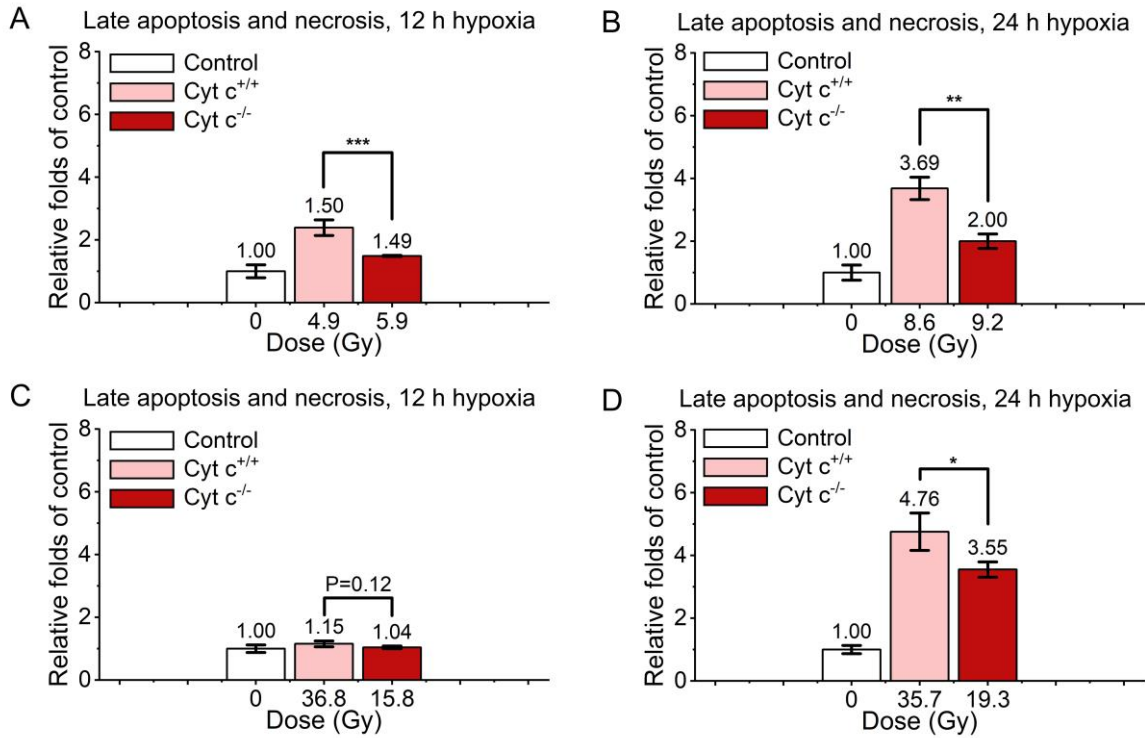

**Supplementary Figure 4.** Comparison of late apoptosis and necrosis between irradiated  $cyt\ c^{+/+}$  and  $cyt\ c^{-/-}$  cells after FLASH irradiation. (A-B) The relative increasement of late apoptosis and necrosis for irradiated  $cyt\ c^{+/+}$  and  $cyt\ c^{-/-}$  cells at 12 h in hypoxia (A), 24 h in hypoxia (B). (C-D) The relative increasement of late apoptosis and necrosis for irradiated  $cyt\ c^{+/+}$  and  $cyt\ c^{-/-}$  cells at 12 h in hypoxia (C), 24 h in hypoxia (D).

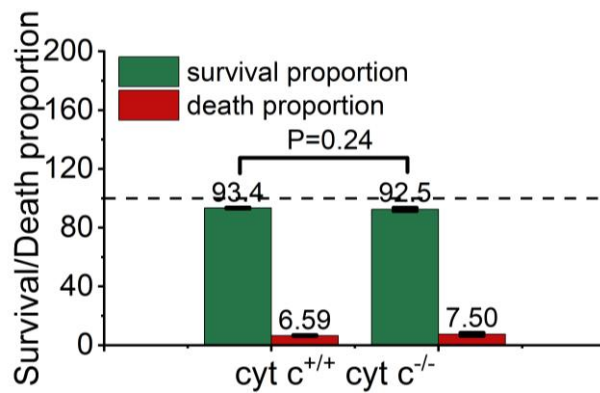

**Supplementary Figure 5.** Viability of  $cyt\ c^{+/+}$  and  $cyt\ c^{-/-}$  cells. Cells were stained with Calcin-AM and PI.

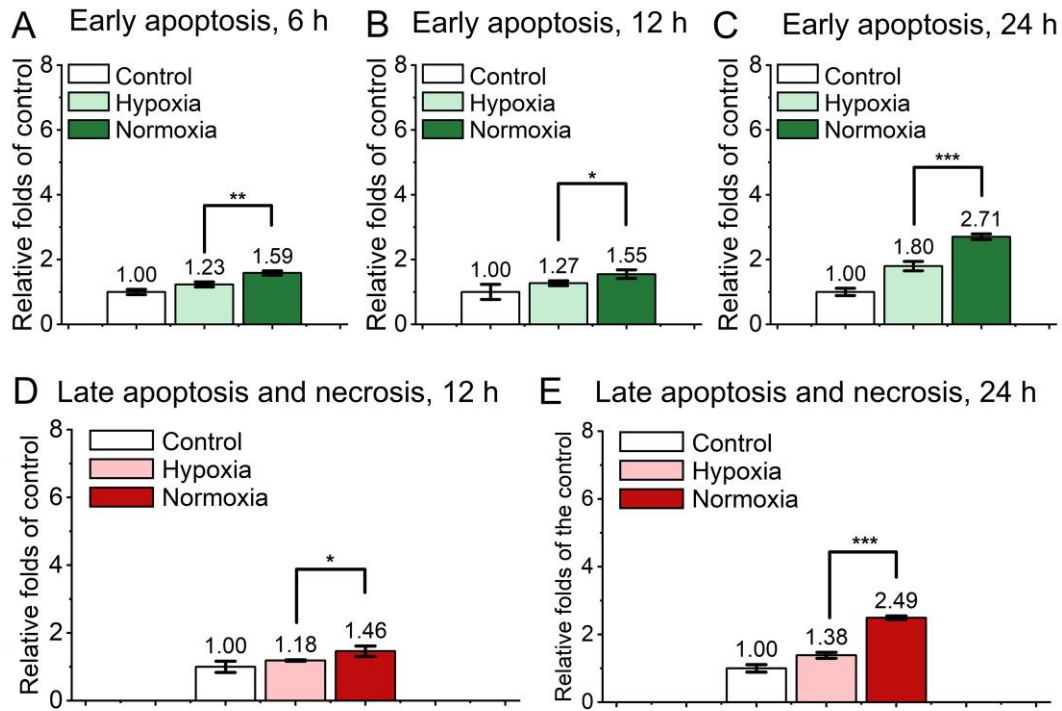

**Supplementary Figure 6.** Early apoptosis, late apoptosis and necrosis of irradiated normal fibroblast cells after conventional irradiation. **(A-C)** The relative increasement of early apoptosis in irradiated cells between hypoxia and normoxia at 6 h (A), 12 h (B) and 24 h (C) after radiation. **(D-E)** The relative increasement of late apoptosis and necrosis in irradiated cells between hypoxia and normoxia at 12 h (D) and 24 h (E) after radiation.

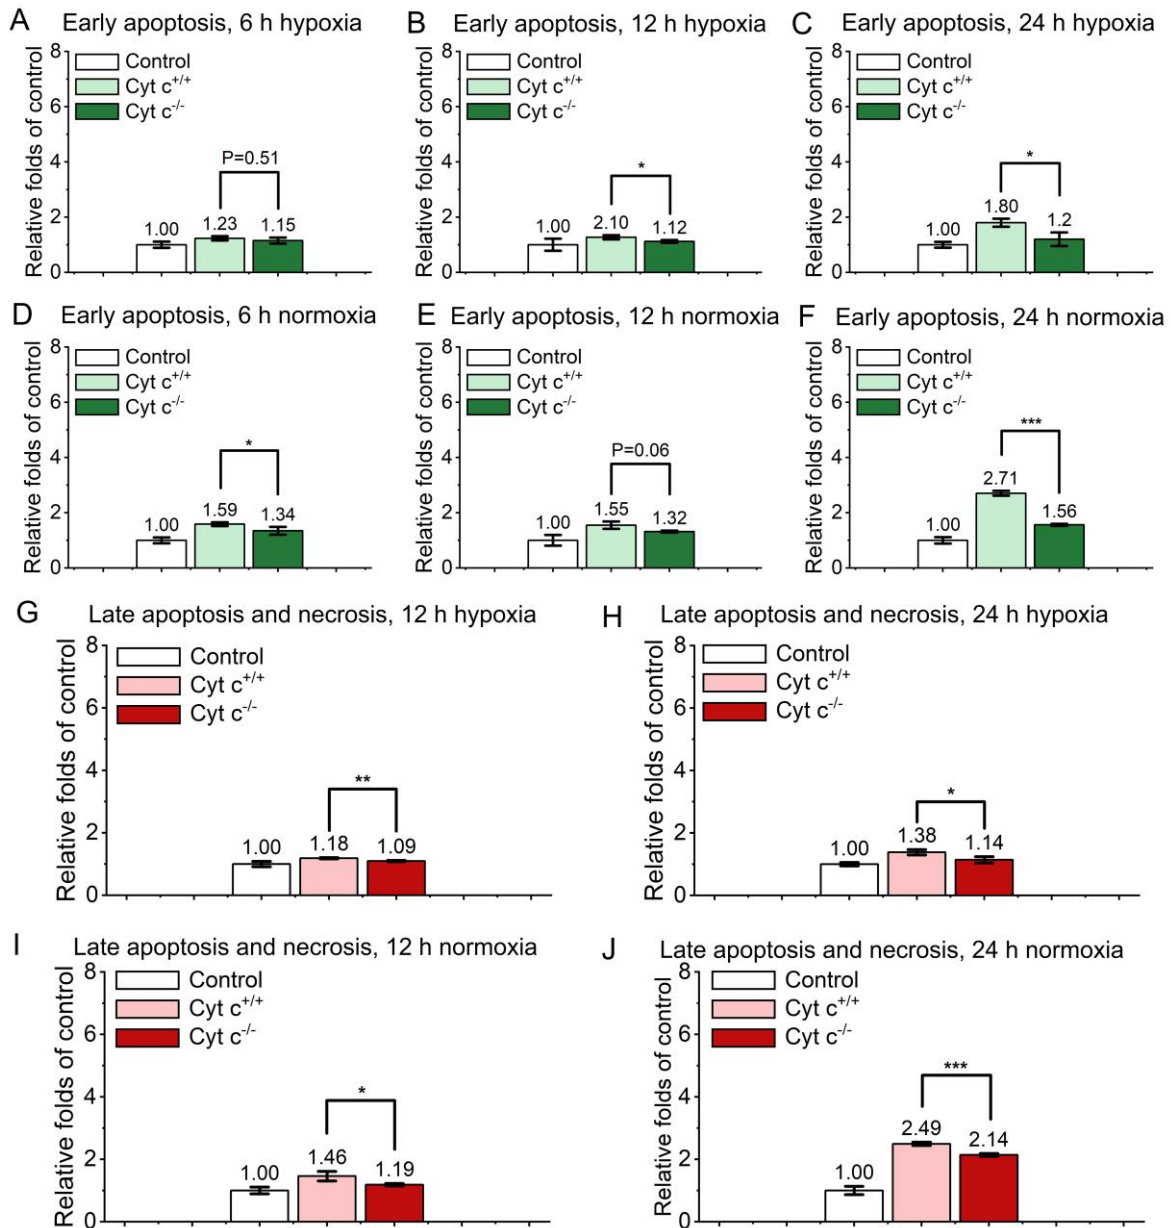

**Supplementary Figure 7.** Comparison of early apoptosis, late apoptosis and necrosis between irradiated  $c^{+/+}$  and  $c^{-/-}$  cells after conventional irradiation at the dose of 30 Gy. **(A-F)** The relative increase of early apoptosis for irradiated  $c^{+/+}$  and  $c^{-/-}$  cells at 6 h in hypoxia (A), 6 h in normoxia (D), 12 h in hypoxia (B), 12 h in normoxia (E), 24 h in hypoxia (C) and 24 h in normoxia (F). **(G-J)** The relative increase of late apoptosis and necrosis for irradiated  $c^{+/+}$  and  $c^{-/-}$  cells at 12 h in hypoxia (G), 12 h in normoxia (I), 24 h in hypoxia (H), and 24 h in normoxia (J).

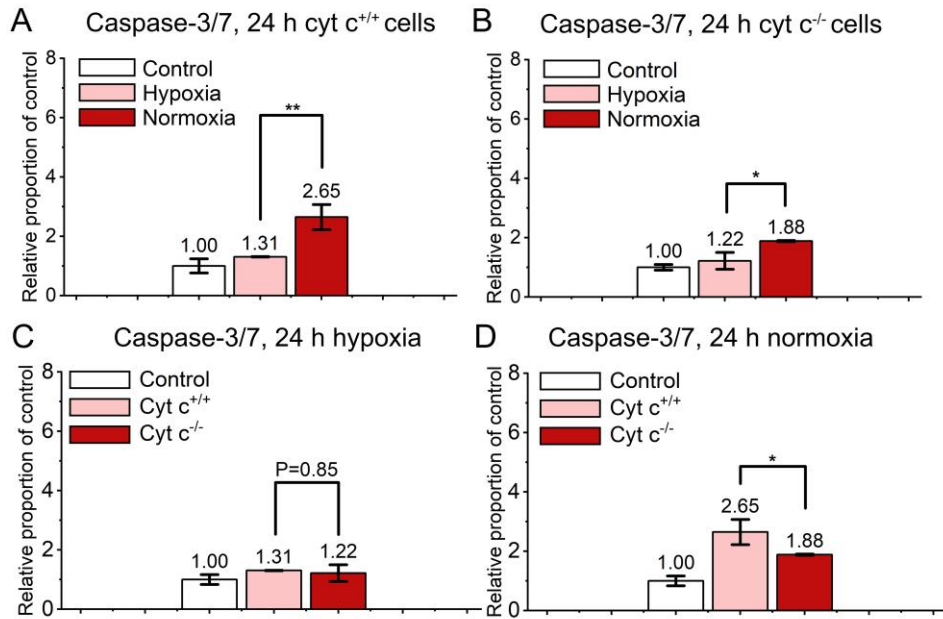

**Supplementary Figure 8.** Caspase-3/7 level of irradiated cyt  $c^{+/+}$  and cyt  $c^{-/-}$  cells under hypoxia and normoxia at 24 h after conventional irradiation at the dose of 30 Gy. **(A-B)** The relative proportion of caspase-3/7 level between hypoxia and normoxia of cyt  $c^{+/+}$  (A) and cyt  $c^{-/-}$  (B) cells. **(C-D)** The relative increase of caspase-3/7 level for irradiated cyt  $c^{+/+}$  and cyt  $c^{-/-}$  cells at 24 h in hypoxia (C) and 24 h in normoxia (D).
